# Supplementary material for: Exploring the neurogenic differentiation of human dental pulp stem cells
Source: PubMed Central journal article supplement (PMC9635714; doi:10.1371/journal.pone.0277134), 2022-11-04
Supplement: pone.0277134.s001.pdf [file pone.0277134.s001.pdf]

**S1 Table: hDPSC information and stem cell characterization.**

| <b>Reported Information</b>                                                        | <b>DPSCs<br/>(Lonza, Slough, UK)</b>                                                                                                                                                                                                                                                                                                                                                                                                                    | <b>DPSCs<br/>(Axol, Cambridge, UK)</b>                                                                                                                                                                                                                                    |
|------------------------------------------------------------------------------------|---------------------------------------------------------------------------------------------------------------------------------------------------------------------------------------------------------------------------------------------------------------------------------------------------------------------------------------------------------------------------------------------------------------------------------------------------------|---------------------------------------------------------------------------------------------------------------------------------------------------------------------------------------------------------------------------------------------------------------------------|
| <b>Product code</b>                                                                | PT-5025                                                                                                                                                                                                                                                                                                                                                                                                                                                 | ax3901                                                                                                                                                                                                                                                                    |
| <b>Donor gender</b>                                                                | Male                                                                                                                                                                                                                                                                                                                                                                                                                                                    | Female                                                                                                                                                                                                                                                                    |
| <b>Donor age</b>                                                                   | 16 yrs.                                                                                                                                                                                                                                                                                                                                                                                                                                                 | 14 yrs.                                                                                                                                                                                                                                                                   |
| <b>Stem cell markers</b>                                                           | <p>≥ 90% positive for CD105, CD166, CD29, CD90 and CD73 markers.</p> <p>≤ 10% positive for CD34, CD45, and CD133 markers.</p>                                                                                                                                                                                                                                                                                                                           | <p>&gt; 90% positive for CD29, CD44, CD90, and CD105 markers.</p> <p>&lt;10% positive for CD34 and CD45 markers.</p>                                                                                                                                                      |
| <b>Multilineage differentiation validation</b>                                     | –                                                                                                                                                                                                                                                                                                                                                                                                                                                       | Osteogenic, adipogenic, and chondrogenic differentiation.                                                                                                                                                                                                                 |
| <b>Virus and Microbiological testing</b>                                           | Negative                                                                                                                                                                                                                                                                                                                                                                                                                                                | Negative                                                                                                                                                                                                                                                                  |
| <b>The culturing and sub-culturing materials to prepare a good cryovial stock.</b> | <p>- DPSC BulletKit™ Medium (PT-3005, Lonza) supplied as 1 ml/5 cm<sup>2</sup> includes:</p> <p>DPSC basal Medium (PT-3927, Lonza),</p> <p>DPSC Growth Medium (PT-4516): contains 50 ml DPSC growth supplement, 10 ml L-glutamine, 5.0 ml Ascorbic Acid, and 0.5 ml Gentamicin/Amphotericin-B</p> <p>-Reagent Pack™ Subculture Reagents (CC-5034, UK): HEPES Buffered Saline Solution, 0.25% Trypsin/EDTA, and Trypsin Neutralizing Solution (TNS).</p> | <p>- Alpha-modified minimum essential medium (α-MEM) (Biosera, UK) with 2 mM L-glutamine, 1% antibiotics (penicillin/streptomycin (100 IU.ml<sup>-1</sup>), and 10% FBS.</p> <p>- Standard sub-culturing materials; (0.25% Trypsin/EDTA, and 10% FBS complete media).</p> |
