# Supplementary material for: Exploring the neurogenic differentiation of human dental pulp stem cells
Source: PubMed Central journal article supplement (PMC9635714; doi:10.1371/journal.pone.0277134), 2022-11-04
Supplement: pone.0277134.s002.pdf [file pone.0277134.s002.pdf]

**S3 Table: The antibodies and dilutions used for immunocytochemical analysis**

| <b>Antibody</b>                                  | <b>Type</b> | <b>Host species</b> | <b>Description</b> | <b>Dilution</b> | <b>Reactivity</b>                                   | <b>Product number</b> | <b>Supplier</b>                          |
|--------------------------------------------------|-------------|---------------------|--------------------|-----------------|-----------------------------------------------------|-----------------------|------------------------------------------|
| <b>Anti-<math>\beta</math>III-tubulin (2G10)</b> | Primary     | Mouse               | Monoclonal         | 1:500           | Human, mouse, rat, rabbit, chicken, cow, cat, quail | ab78078               | Abcam, UK                                |
| <b>Anti-160 kD Neurofilament Medium</b>          | Primary     | Rabbit              | Polyclonal         | 1:1000          | Human, rat, cow                                     | ab9034                | Abcam, UK                                |
| <b>Anti-GFAP</b>                                 | Primary     | Rabbit              | Monoclonal         | 1:500           | Human, rat                                          | ab33922               | Abcam, UK                                |
| <b>Alexa Fluor 488</b>                           | Secondary   | Goat                | Monoclonal         | 1:400           | Anti-mouse                                          | A20181                | Invitrogen, Thermo Fisher Scientific, UK |
| <b>Alexa Fluor 555</b>                           | Secondary   | Goat                | Polyclonal         | 1:500           | Anti-Rabbit                                         | ab150078              | Abcam, UK                                |
