# Supplementary material for: Exploring the neurogenic differentiation of human dental pulp stem cells
Source: PubMed Central journal article supplement (PMC9635714; doi:10.1371/journal.pone.0277134), 2022-11-04
Supplement: pone.0277134.s003.pdf [file pone.0277134.s003.pdf]

**S4 Table: The primer details used for real-time PCR.**

| Gene                      | Primer sequence (5→3)                                         | Amplicon size (bp) | Accession number (NCBI) | Efficiency value |       |
|---------------------------|---------------------------------------------------------------|--------------------|-------------------------|------------------|-------|
|                           |                                                               |                    |                         | SH-SY5Y          | DPSCs |
| <b>Housekeeping genes</b> |                                                               |                    |                         |                  |       |
| GAPDH                     | (F) CTCCTGTTCGACAGTCAG<br>(R) GCCCAATACGACCAAATC              | 111                | NM_002046.7             | 1.70             | 1.80  |
| RPL13A                    | (F) CCTGGAGGAGAAGAGGAAAAGAGA<br>(R) TTGAGGACCTCTGTGTATTTGTCAA | 126                | NM_012423.4             | 1.90             | 1.70  |
| B2M                       | (F) ACCCCCACTGAAAAAGATGA<br>(R) ATCTTCAAACCTCCATGATG          | 114                | NM_004048.3             | 1.60             | 1.90  |
| HPRT1                     | (F) GACCAGTCAACAGGGGACAT<br>(R) AACACTTCGTGGGGTCCTTTTC        | 195                | NM_000194.3             | 1.90             | 1.70  |
| <b>Target genes</b>       |                                                               |                    |                         |                  |       |
| ENO2<br>(NSE)             | (F) CTGAAGCCATCCAAGCGTGC<br>(R) CCCACCACCAGGTCAGCAAT          | 109                | NM_001975.2             | 1.85             | 1.92  |
| NES                       | (F) GAGAACTCCCGGCTGCAAAC<br>(R) CCAGCTTGGGGTCCTGAAAG          | 70                 | NM_006617.1             | 1.83             | 1.93  |
| SYN1                      | (F) AATACTGGCTCTGCGATGCT<br>(R) TGACCACGAGCTCTACGATG          | 223                | NM_006950.3             | 1.94             | 1.78  |
| GFAP                      | (F) CCATTCCCGTGCAGACCTTC<br>(R) TCTGAGAGGCAGGCAGCTAAC         | 180                | NM_0011310<br>19.2      | 2.07             | 1.60  |
| PRPH                      | (F) AGATCGCCACCTACCGCAAG<br>(R) CCCATTCCGGGTCTCAATGGT         | 170                | NM_006262.3             | 2.08             | 1.85  |
| SCN9A                     | (F) GGCAACTTCTGATGACAGCG<br>(R) GTGCAAATCTGTACCACCAAGG        | 200                | NM_0013655<br>36.1      | 2.01             | 2.05  |
| DBH                       | (F) CAGATATCTCCGCCTGGAAG<br>(R) TGCAGTAGCCAGTGAGGATG          | 197                | NM_000787.3             | 1.76             | _     |
| POU4F1                    | (F) TTGCCATGCATCCCACCCTC<br>(R) TGAAAGGATGGCTCTTGCCCT         | 198                | NM_006237.3             | 2.03             | 1.60  |
| CHAT                      | (F) TCCAACGAGGACGAGCGTTT<br>(R) ATCATGTCCAGCGAGTCCCG          | 122                | NM_0011429<br>34.1      | 2.10             | 1.93  |

|       |                                                      |     |                    |      |      |
|-------|------------------------------------------------------|-----|--------------------|------|------|
| ACHE  | (F) CCTCCTTGGACGTGTACGAT<br>(R) AAACAGCGTCACTGATGTCG | 218 | NM_0013026<br>22.2 | 1.64 | 1.72 |
| GAP43 | (F) CAGAATTAAGGGAACCTGG<br>(R) TGTGACTCATTTTCCTTGTG  | 93  | NM_0011300<br>64   | 2.04 | 2.10 |
| MNX1  | (F) GTTCAAGCTCAACAAGTACC<br>(R) GGTCTGGAACCAAATCTTC  | 98  | NM_0011652<br>55   | 1.65 | 1.88 |

Abbreviations: GAPDH (glyceraldehyde-3-phosphate dehydrogenase); RPL13A (ribosomal protein L13A); B2M (beta-2-microglobulin); HPRT1 (hypoxanthine phosphoribosyltransferase 1); ENO2/NSE (enolase 2/neuron-specific enolase); NES (nestin); SYN1 (synapsin I); GFAP (glial fibrillary acidic protein); PRPH (peripherin); SCN9A (voltage-gated sodium channel alpha subunit 9); DBH (dopamine beta-hydroxylase); POU4F1 (POU class 4 homeobox 1); CHAT (choline O-acetyltransferase); ACHE (acetylcholinesterase); GAP43 (growth associated protein 43); MNX1 (motor neuron and pancreas homeobox 1).
